# Supplementary material for: Purification of ethanol for highly sensitive self-assembly experiments
Source: publisher site journal article supplement (doi:10.3762/bjnano.5.139), 2014-08-12
Supplement: Additional file 1 [file 2190-4286-5-139-S1.pdf]

**Supporting Information**  
**for**  
**Purification of ethanol for highly sensitive self-**  
**assembly experiments**

Kathrin Barbe<sup>1</sup>, Martin Kind<sup>1</sup>, Christian Pfeiffer<sup>2</sup> and Andreas Terfort\*<sup>1</sup>

Address: <sup>1</sup>Institut für Anorganische und Analytische Chemie, Goethe-Universität  
Frankfurt, Max-von-Laue-Straße 7, 60438 Frankfurt am Main, Germany and

<sup>2</sup>Fachbereich Chemie, Philipps Universität Marburg, Hans-Meerwein-Straße, 35032  
Marburg, Germany

Email: Andreas Terfort - [aterfort@chemie.uni-frankfurt.de](mailto:aterfort@chemie.uni-frankfurt.de)

\* Corresponding author

**Additional diagramms**

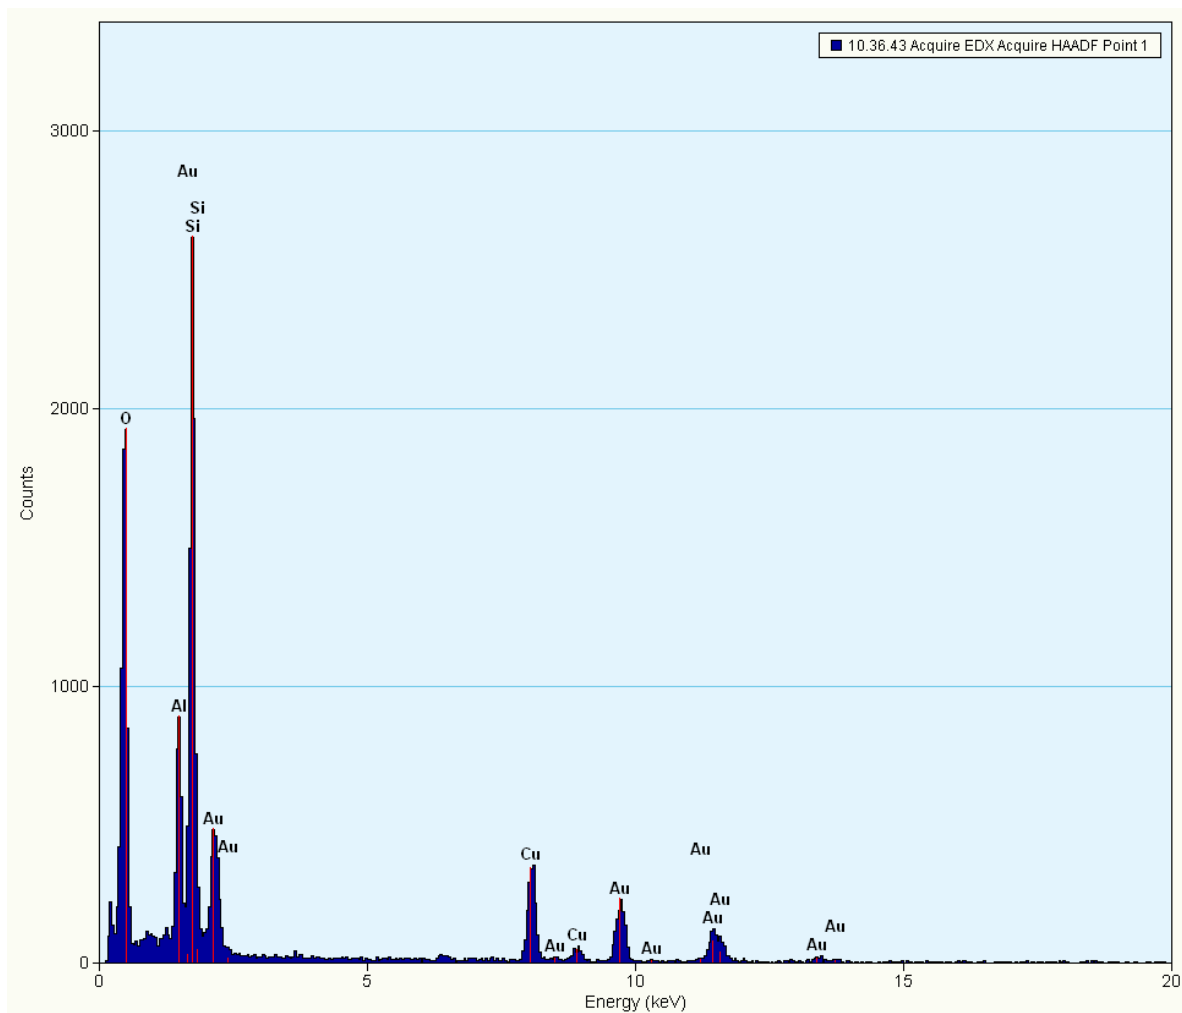

**Figure S1:** Energy-dispersive X-ray (EDX) spectrum of a gold-NP in a grain of zeolite-supported gold-NP material. Note that the Al, Si, O and Au signals are due to the sample while the Cu signal stems from the TEM grid.

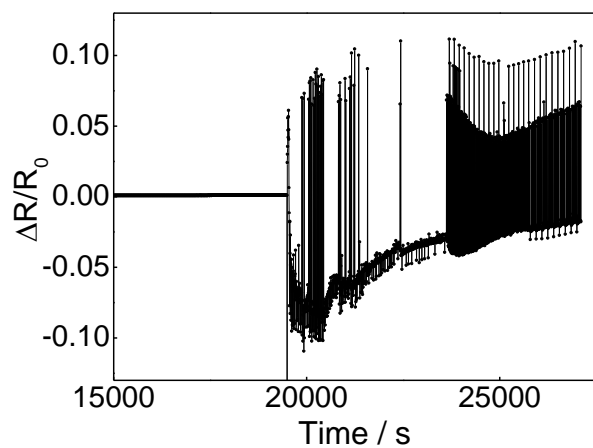

**Figure S2:** Relative change of resistivity of a thin gold film sensor upon immersion into ethanol technical grade, 99%, denatured with 1% petrol ether. In this case the ethanol was distilled prior to treatment with the gold-NP impregnated zeolites but not distilled afterwards. The scattering in the measured resistivity indicates leakage currents that are due to the presence of chloride ions.

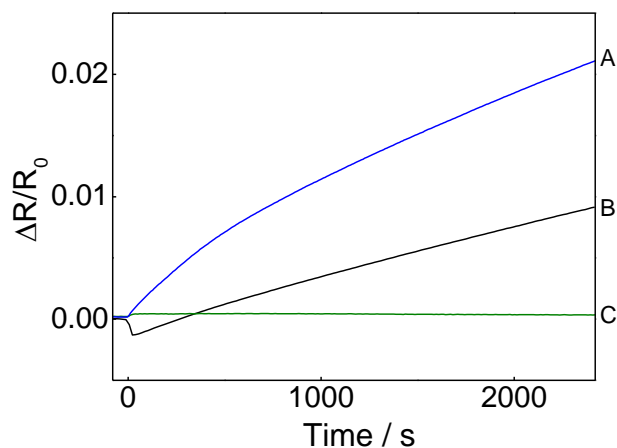

**Figure S3:** Relative change of resistivity of a gold film sensor upon immersion into ethanol species of different purity grades at 298 K. The sensor was immersed into the liquids at 0 seconds. The successive resistivity change indicates chemisorption of contaminant species in the ethanol samples onto the gold surface. For sample C, no chemisorption could be detected using this sensor system.

A: ethanol technical grade, 99%, denatured with 1% petrol ether, after distillation (curve identical to curve C in Figure 3)

B: ethanol of type A, cleaned with NP-impregnated zeolite and distilled

C: ethanol of type A, twice cleaned with NP-impregnated zeolite and distilled (curve identical to curve G in Figure 3)
